# Supplementary material for: Role of feeding specialization in taste receptor loss: insights from sweet and umami receptor evolution in Carnivora
Source: PubMed Central journal article supplement (PMC9680018; doi:10.1093/chemse/bjac033), 2022-11-22
Supplement: bjac033_suppl_supplementary_material.pdf [file bjac033_suppl_supplementary_material.pdf]

## Role of feeding specialization in taste receptor loss: insights from sweet and umami receptor evolution in Carnivora

Mieczysław Wolsan<sup>1</sup> and Jun J. Sato<sup>2</sup>

<sup>1</sup>Museum and Institute of Zoology, Polish Academy of Sciences, Wilcza 64, 00-679 Warszawa, Poland

<sup>2</sup>Department of Biotechnology, Fukuyama University, Higashimura-cho, Aza, Sanzo, 985-1, Fukuyama 729-0292, Japan

### Contents

|                                                                                                                        |    |
|------------------------------------------------------------------------------------------------------------------------|----|
| Table S1: Origin and accessibility of DNA sequences generated in this study .....                                      | 2  |
| Table S2: Information on DNA sequences retrieved from DDBJ/ENA/GenBank .....                                           | 4  |
| Table S3: Primers used to amplify exon 1 of <i>TAS1R1</i> .....                                                        | 5  |
| Table S4: Primers used to amplify exon 2 of <i>TAS1R1</i> .....                                                        | 5  |
| Table S5: Primers used to amplify exon 3 of <i>TAS1R1</i> .....                                                        | 6  |
| Table S6: Primers used to amplify exon 4 of <i>TAS1R1</i> .....                                                        | 7  |
| Table S7: Primers used to amplify exon 5 of <i>TAS1R1</i> .....                                                        | 8  |
| Table S8: Primers used to amplify exon 6 of <i>TAS1R1</i> .....                                                        | 9  |
| Table S9: Primers used to amplify exon 1 of <i>TAS1R2</i> .....                                                        | 10 |
| Table S10: Primers used to amplify exon 2 of <i>TAS1R2</i> .....                                                       | 10 |
| Table S11: Primers used to amplify exon 3 of <i>TAS1R2</i> .....                                                       | 10 |
| Table S12: Primers used to amplify exon 4 of <i>TAS1R2</i> .....                                                       | 10 |
| Table S13: Primers used to amplify exon 5 of <i>TAS1R2</i> .....                                                       | 11 |
| Table S14: Primers used to amplify exon 6 of <i>TAS1R2</i> .....                                                       | 11 |
| Table S15: Primers used to amplify exon 1 of <i>TAS1R3</i> .....                                                       | 11 |
| Table S16: Primers used to amplify exon 2 of <i>TAS1R3</i> .....                                                       | 12 |
| Table S17: Primers used to amplify exon 3 of <i>TAS1R3</i> .....                                                       | 13 |
| Table S18: Primers used to amplify exon 4 of <i>TAS1R3</i> .....                                                       | 14 |
| Table S19: Primers used to amplify exon 5 of <i>TAS1R3</i> .....                                                       | 14 |
| Table S20: Primers used to amplify exon 6 of <i>TAS1R3</i> .....                                                       | 15 |
| Figure S1: Evolution of the sweet and umami taste receptors in Carnivora in relation to feeding habits and modes ..... | 16 |
| References .....                                                                                                       | 17 |

**Table S1.** Origin and accessibility of DNA sequences generated in this study

| Species                         | Voucher specimen, tissue sample, and/or DNA sample |                                                                                | DDBJ/ENA/GenBank accession |          |          |
|---------------------------------|----------------------------------------------------|--------------------------------------------------------------------------------|----------------------------|----------|----------|
|                                 | Reference number(s)                                | Geographic origin                                                              | TAS1R1                     | TAS1R2   | TAS1R3   |
| <i>Ailurus fulgens</i>          | JS 191                                             | Asa Zoological Park, Hiroshima, Japan<br>(no wild locality)                    | LC727905                   | LC654483 | LC654495 |
| <i>Amblonyx cinereus</i>        | MZB 24297, JS 190                                  | Jawa, Indonesia                                                                | LC727906                   | LC654484 | LC727947 |
| <i>Arctonyx collaris</i>        | YP 6001, JS 212                                    | Xishuangbanna, Yunnan, China                                                   | LC727907                   | —        | LC727948 |
| <i>Canis lupus</i>              | JS 230                                             | <b>Hruskie, Augustów Forest, Poland</b>                                        | LC727908                   | —        | LC727949 |
| <i>Cerdocyon thous</i>          | GD 515, JS 272                                     | Central, Paraguay                                                              | LC727909                   | —        | LC727950 |
| <i>Enhydra lutris</i>           | TH 257, JS 122                                     | Alaska, USA                                                                    | LC727910                   | —        | LC727951 |
| <i>Galictis cuja</i>            | MC 795, JS 270                                     | <b>42°28'10" S, 64°22'06" W, Valdes</b><br>Peninsula, Chubut, Argentina        | —                          | LC654485 | LC654496 |
| <i>Gulo gulo</i>                | TH 150, JS 193                                     | Sakhalin, Russia                                                               | LC727911                   | —        | LC727952 |
| <i>Ictonyx striatus</i>         | JS 678                                             | No locality                                                                    | LC727912                   | —        | LC727953 |
| <i>Lontra canadensis</i>        | TH 332, JS 162                                     | Canada                                                                         | LC727913                   | —        | LC654497 |
| <i>Lontra longicaudis</i>       | MFA-ZV-MH 2, JS 273                                | <b>Cayastá, Santa Fé, Argentina</b>                                            | LC727914                   | LC654486 | LC727954 |
| <i>Lutra lutra</i>              | JS 331                                             | Wetlina, Bieszczady Mountains, Poland                                          | LC727915                   | LC654487 | LC727955 |
| <i>Lycalopex gymnocercus</i>    | JS 326                                             | Buenos Aires, Argentina                                                        | LC727916                   | —        | LC727956 |
| <i>Lyncodon patagonicus</i>     | MC 379, JS 266                                     | Puerto Madryn, Chubut, Argentina                                               | —                          | LC654488 | —        |
| <i>Lynx lynx</i>                | JS 328                                             | <b>Białowieża Forest, Poland</b>                                               | LC727917                   | —        | LC727957 |
| <i>Martes americana</i>         | TH 329, JS 150                                     | Indian Creek, Whiteshell Provincial Park,<br>Manitoba, Canada                  | LC727918                   | —        | LC727958 |
| <i>Martes foina</i>             | JS 320                                             | <b>Białowieża, Poland</b>                                                      | LC727919                   | —        | LC727959 |
| <i>Martes melampus</i>          | TH 358, JS 218                                     | Tokushima, Shikoku, Japan                                                      | LC727920                   | LC654489 | LC654498 |
| <i>Martes zibellina</i>         | TH 401, JS 228                                     | Teshio, Hokkaido, Japan                                                        | LC727921                   | —        | LC727960 |
| <i>Meles anakuma</i>            | KT 2996, JS 12                                     | Miyazaki, Kyushu, Japan                                                        | LC727922                   | LC654490 | LC654499 |
| <i>Mellivora capensis</i>       | SU HB30, JS 239                                    | <b>25°37'58" S, 20°34'57" E, Kgalagadi</b><br>Transfrontier Park, South Africa | LC727923                   | —        | —        |
| <i>Melogale moschata</i>        | AK 703, JS 95                                      | Vietnam                                                                        | LC727924                   | —        | —        |
|                                 | TH 322, HS 2372, JS 143                            | Taichung County, Taiwan                                                        | LC727925                   | —        | LC727961 |
| <i>Melursus ursinus</i>         | HS 1421, JS 323                                    | Nogeyama Zoological Gardens,<br>Yokohama, Japan (no wild locality)             | LC727926                   | —        | LC727962 |
| <i>Mephitis mephitis</i>        | HTS 3, JS 803                                      | Obihiro Zoo, Japan (no wild locality)                                          | LC727927                   | LC654491 | LC654500 |
| <i>Mustela altaica</i>          | AK 805, JS 106                                     | Cherga, Altai Republic, Russia                                                 | LC727928                   | —        | LC727963 |
| <i>Mustela erminea</i>          | TH 324, JS 145                                     | Canada                                                                         | LC727929                   | —        | LC727964 |
| <i>Mustela kathiah</i>          | TH 321, JS 155                                     | Kunming, Yunnan, China                                                         | LC727930                   | —        | LC727965 |
| <i>Mustela lutreola</i>         | AK 13, JS 41                                       | Novosibirsk, Russia                                                            | LC727931                   | —        | LC727966 |
| <i>Mustela nivalis</i>          | SY 120, JS 795                                     | Otoineppu, Hokkaido, Japan                                                     | LC727932                   | LC654492 | LC654501 |
| <i>Mustela putorius</i>         | JS 797                                             | <b>Białowieża, Poland</b>                                                      | LC727933                   | —        | LC727967 |
| <i>Mustela sibirica</i>         | TH 446, JS 280                                     | Primorsky Krai, Russia                                                         | LC727934                   | —        | LC727968 |
| <i>Mustela strigidorsa</i>      | ANWC M32057, HS 4042                               | Oudomsouk, Nakai, Khammouan, Laos                                              | LC727935                   | —        | LC727969 |
| <i>Mydaus javanensis</i>        | JS 229                                             | Mount Salak, Bogor, Java, Indonesia                                            | LC727936                   | —        | LC727970 |
| <i>Neogale vison</i>            | TH 445, JS 279                                     | Primorsky Krai, Russia                                                         | LC727937                   | —        | LC727971 |
| <i>Nyctereutes procyonoides</i> | JS 235                                             | <b>Urwitat, Mikołajki, Poland</b>                                              | LC727938                   | —        | LC727972 |

(Continued)

**Table S1 (Continued)**

| Species                           | Voucher specimen, tissue sample, and/or DNA sample |                                        | DDBJ/ENA/GenBank accession |          |          |
|-----------------------------------|----------------------------------------------------|----------------------------------------|----------------------------|----------|----------|
|                                   | Reference number(s)                                | Geographic origin                      | TAS1R1                     | TAS1R2   | TAS1R3   |
| <i>Paguma larvata</i>             | TH 113, JS 806                                     | Ehime, Shikoku, Japan                  | LC727939                   | —        | —        |
| <i>Paradoxurus hermaphroditus</i> | JS 805                                             | Myanmar                                | LC727940                   | —        | —        |
| <i>Pekania pennanti</i>           | TH 331, JS 152                                     | Manitoba, Canada                       | LC727941                   | —        | LC727973 |
| <i>Procyon cancrivorus</i>        | MFA-ZV-MH 17, JS 327                               | <b>Garay, Santa Fé, Argentina</b>      | LC727942                   | —        | —        |
| <i>Taxidea taxus</i>              | TH 334, JS 182                                     | Napinka, Manitoba, Canada              | LC727943                   | —        | LC727974 |
| <i>Ursus thibetanus</i>           | AK 740, JS 324                                     | Beltsovo, Primorsky Krai, Russia       | LC727944                   | LC654493 | LC654502 |
| <i>Vormela peregusna</i>          | IPEE 345, JS 269                                   | Lake Sevan region, Armenia             | LC727945                   | —        | LC727975 |
| <i>Vulpes vulpes</i>              | JS 234                                             | <b>Różan, Maków Mazowiecki, Poland</b> | LC727946                   | LC654494 | LC654503 |

AK, Alexey Kryukov's collection deposited in the Institute of Biology and Soil Science, Russian Academy of Sciences, Vladivostok, Russia; ANWC, Australian National Wildlife Collection, Commonwealth Scientific and Industrial Research Organisation, Canberra, Australia; GD, Guillermo D'Elía's collection deposited in the Museo de Historia Natural de Paraguay, Asunción, Paraguay; HS and HTS, Hitoshi Suzuki's collection deposited in the Graduate School of Environmental Science, Hokkaido University, Sapporo, Japan; IPEE, Animal Tissue Depository for DNA Analysis, A. N. Severtsov Institute of Ecology and Evolution, Russian Academy of Sciences, Moscow, Russia; JS, Jun Sato's collection deposited in the Department of Biotechnology, Fukuyama University, Japan; KT, Kimiyuki Tsuchiya's collection deposited in the Graduate School of Environmental Science, Hokkaido University, Sapporo, Japan; MC, Marcelo Carrera's collection, Puerto Madryn, Argentina; MFA-ZV-MH, Área Zoología Vertebrados, Museo Provincial de Ciencias Naturales "Florentino Ameghino," Santa Fé, Argentina; MZB, Museum Zoologicum Bogoriense, Indonesian Institute of Sciences, Cibinong, Indonesia; SU, Department of Botany and Zoology, Stellenbosch University, Stellenbosch, South Africa; SY, Shumpei Yasuda's collection deposited in the Department of Biotechnology, Fukuyama University, Japan; TH, Tetsuji Hosoda's collection deposited in the Department of Biotechnology, Fukuyama University, Japan; YP, Ya-Ping Zhang's collection deposited in the Kunming Institute of Zoology, Chinese Academy of Sciences, Kunming, China.

**Table S2.** Information on DNA sequences retrieved from DDBJ/ENA/GenBank

| Species                       | DDBJ/ENA/GenBank accession |                       |                 |
|-------------------------------|----------------------------|-----------------------|-----------------|
|                               | TAS1R1                     | TAS1R2                | TAS1R3          |
| <i>Ailuropoda melanoleuca</i> | —                          | GCA_000004335.1       | —               |
| <i>Ailurus fulgens</i>        | —                          | —                     | LNAC01000817    |
| <i>Amblonyx cinereus</i>      | —                          | JN130352 <sup>a</sup> | —               |
| <i>Canis familiaris</i>       | GCA_000002285.2            | GCA_000002285.2       | GCA_000002285.2 |
| <i>Enhydra lutris</i>         | GCA_002288905.2            | GCA_002288905.2       | GCA_002288905.2 |
| <i>Felis catus</i>            | GCA_018350175.1            | —                     | —               |
| <i>Lutra canadensis</i>       | —                          | JN130357              | —               |
| <i>Martes flavigula</i>       | —                          | LC425460              | —               |
| <i>Martes martes</i>          | —                          | LC425461              | —               |
| <i>Mustela itatsi</i>         | —                          | LC425463              | —               |
| <i>Mustela nudipes</i>        | —                          | LC425464              | —               |
| <i>Procyon lotor</i>          | —                          | LC425470              | LC425487        |
| <i>Ursus maritimus</i>        | —                          | GCA_000687225.1       | —               |

<sup>a</sup>Only exon 3.

**Table S3.** Primers used to amplify exon 1 of *TAS1R1*

| Name                    | Sequence (5' to 3')        | Source      |
|-------------------------|----------------------------|-------------|
| T1R1_EX1_F1             | GGCCATGCCAGGCACAGGAC       | Reference 1 |
| T1R1_EX1_R1             | CCCCTCACTCACCTGTCACAGAGRGT | Reference 1 |
| Tas1r1_ex1_CanidR1      | GCAGAGGTCCTTCTAGGCACAG     | This study  |
| Tas1r1_ex1_dogpandaF1   | CTCTGCTCGGCCATGCCAGGCA     | This study  |
| Tas1r1_ex1_dogpandaR1   | CCCCAGAGGCAGAAAGGGCA       | Reference 2 |
| Tas1r1_Ex1_Fw2          | GGCCAGCATGTCACTCCTGGCAGCT  | This study  |
| Tas1r1_ex1_GuloF1       | GCCAGGCACAGGAGCGTCTGGCC    | This study  |
| Tas1r1_ex1_GuloF2       | GAGAGCTCTGCTCGGCCATGCC     | This study  |
| Tas1r1_ex1_GuloR1       | CCGGCAGAGAGACTTTTAGGCAC    | This study  |
| Tas1r1_ex1_GuloR2       | TAGGCACAGGACCCCCCACTCAC    | This study  |
| Tas1r1_ex1_GuloR3       | CAGTCACCGTGGGCCTGCGTCT     | This study  |
| Tas1r1_ex1_GuloR4       | CCGGACAGTGAGAGTGCACA       | This study  |
| Tas1r1_ex1_intCanidF1   | GCCACAACACAGAGTCATCTCC     | This study  |
| Tas1r1_ex1_intMustlctF1 | TGCTGCTGGGCCCTCAGCTGCCAC   | This study  |
| Tas1r1_ex1_intMustlctF2 | CCTGGCAGCTCACCTGGTCAGCC    | This study  |
| Tas1r1_ex1_MustelaF1    | CTCTGCTCGGCCATGCCAGGCG     | Reference 2 |
| Tas1r1_ex1_MustelaF2    | GAAATTGGGAAGCATCTGGGCGGC   | This study  |
| Tas1r1_ex1_MustelaR1    | TGGCGCCAGGGAAGGTCTAGCC     | Reference 2 |
| Tas1r1_ex1_MustlctR1    | GCGAGGGACTGGAGGTGGTTCA     | This study  |
| Tas1r1_ex1_MustlctR2    | TGAAGGTGGTGGCTGTAGGATGG    | This study  |
| Tas1r1_Ex1_Rv2          | CACCGTGGGCCTGCGTCTCACC     | This study  |

**Table S4.** Primers used to amplify exon 2 of *TAS1R1*

| Name                        | Sequence (5' to 3')       | Source      |
|-----------------------------|---------------------------|-------------|
| T1R1_EX2_F1                 | GCTCTCAGCYKGGCTTTCTCYACAG | Reference 1 |
| T1R1_EX2_R2                 | CACAGGCACCAGAAACGGGCTCA   | Reference 2 |
| Tas1r1_ex2_CanidIntF1       | GAGGAGATCAACAACCTCCAC     | This study  |
| Tas1r1_ex2_dogF1            | AAGAGGGTTTCGGCAAGGCCTTGC  | This study  |
| Tas1r1_ex2_dogR1            | GCAGGGCCTCCTGCAATGTGAC    | This study  |
| Tas1r1_ex2_intMusteloideaF1 | GGCCATGGCTACCACCTCTTCC    | This study  |
| Tas1r1_ex2_MustelaPinniR1   | CCCCCTGCAATGTGACTCA       | This study  |
| Tas1r1_ex2_MustelaR1        | GCAGAACCCCTGCAATGTGAC     | This study  |
| Tas1r1_ex2_MustelidaeIntF1  | GACGTGTGCTCCGAGTCGGCCAA   | This study  |
| Tas1r1_ex2_MusteloidIntF1   | CTGCCCTGGCGGTGATTGGGCCTG  | This study  |
| Tas1r1_ex2_MusteloidIntF2   | GCTACCACCTCTTCCAGGCCATG   | This study  |

**Table S5. Primers used to amplify exon 3 of *TAS1R1***

| Name                        | Sequence (5' to 3')        | Source       |
|-----------------------------|----------------------------|--------------|
| Tas1r1_ex3_A_colF2          | CATTGCCTTCAAGGACATCATAC    | This study   |
| Tas1r1_ex3_A_colR2          | CTCGGAGCAAGGCGCATGGGC      | This study   |
| Tas1r1_ex3_AonyxF1          | CTGAACTTGCCGAACGGAACCC     | This study   |
| Tas1r1_ex3_CanidF1          | TTGGCACAGTGTTGGGCGTGG      | This study   |
| Tas1r1_ex3_CanidR1          | TCTGCCCCAACACTTAGTTGGGC    | This study   |
| Tas1r1_ex3_CaniformF1       | TTGAGACTGATGCCACTGAAC      | This study   |
| Tas1r1_ex3_ermineF1         | GCTCTGAATTTCCAGAGGGACGG    | This study   |
| Tas1r1_ex3_ermineR1         | AGGTTGCCAGGGGCTGGGCTCCCTTA | This study   |
| Tas1r1_ex3_FelidF1          | TTGGCACGGTGCTGGGTGTGG      | This study   |
| Tas1r1_ex3_Fw1              | GGAGTGAAGCGGTATTACCC       | Reference 10 |
| Tas1r1_ex3_Fw2_5            | GACTGGGCCATCTCCAGATA       | Reference 2  |
| Tas1r1_ex3_GulF1            | GCTCTGAATTTCCAGATGGGCGG    | This study   |
| Tas1r1_ex3_GuMelcLuF1       | TGTGCCTCTGGAGCCTGTTCCAGGG  | This study   |
| Tas1r1_ex3_intCaniformR1    | GCAATGCAGATGCCCTGCTGGG     | This study   |
| Tas1r1_ex3_intLutlctMustR1  | CCTCTTCAAACCTCTTCAGGCC     | This study   |
| Tas1r1_ex3_intMusteloideaF1 | CACGGTGCTGGGTGTGGCCATCC    | This study   |
| Tas1r1_ex3_intPinUrsF1_last | TGGGCCATCTCCAGACACATCAG    | Reference 2  |
| Tas1r1_ex3_intUrsidF3       | CTGACGGCCAAGGTGTGGATCGC    | This study   |
| Tas1r1_ex3_intUrsidF4       | GGTGGTCGTCTTCTCCAACAGGC    | This study   |
| Tas1r1_ex3_LutF1            | GCTCTGAATTTCCAGATGGATGG    | This study   |
| Tas1r1_ex3_LutGuloR1        | AGGGTGCCAGAGGCTGGGCTACCTTA | This study   |
| Tas1r1_ex3_MusLutGulR1      | CAGGTAATCACCTGTTTCAGGG     | Reference 2  |
| Tas1r1_ex3_MusLutGulR2      | GCTTGCCCTCAGGTAATCACCTG    | This study   |
| Tas1r1_ex3_MustelaCanidF1   | CTGAACTTGCTGAACGGAACCCC    | This study   |
| Tas1r1_ex3_MustelaF1        | TGTCAGCCTCCTATGTCCAGCGG    | This study   |
| Tas1r1_ex3_MustelidaeR1     | GTGAAGCATCATGGCCTGCATC     | This study   |
| Tas1r1_ex3_MusteloideaR1    | AAGTGAAGCCTAAGAGAGGA       | This study   |
| Tas1r1_ex3_MusteloideaR2    | CTGAGAGGAAGCTTCTAACAAAGG   | This study   |
| Tas1r1_ex3_MusteloidPinniR1 | GGCCAGCTGCCTGCTAGAGAA      | Reference 2  |
| Tas1r1_ex3_MustF1           | ATTGGCACGGTGCTGGGTGTGGCCAT | This study   |
| Tas1r1_ex3_PinniF1          | CTGAACTTGCTGAACTGAACCCC    | Reference 2  |
| Tas1r1_ex3_PinniR1_last     | TGCTTGCCCTCAGGAAAGCACCC    | Reference 2  |
| Tas1r1_ex3_Rv1              | GGCCTCTTCAAACCTCTTCAGGC    | Reference 10 |
| Tas1r1_ex3_Rv2_2            | CTGCCAGGGGTAGACTCGGT       | Reference 2  |
| Tas1r1_ex3_UrsusR1          | TTTCAGGGTGCCAGGGTCTGGGT    | This study   |
| Tas1r1_ex3_UrsusR2          | CCTCAAAAAGCAGCCTGTTTCA     | This study   |
| Tas1r1_ex5_MustR2           | CTCGCTGGTGCCCTTCAAGACAGT   | This study   |

**Table S6.** Primers used to amplify exon 4 of *TAS1R1*

| Name                     | Sequence (5' to 3')        | Source      |
|--------------------------|----------------------------|-------------|
| T1R1_EX4_F1              | TATYTCAGCTTCTRGAGCAGATCCGY | Reference 1 |
| T1R1_EX4_R1              | TTACCTGGTTGTCCTYYCCGTGCC   | Reference 1 |
| Tas1r1_ex4_ArctoidF1     | GGCAGCTCCCTGATCCCTGTTTA    | Reference 2 |
| Tas1r1_ex4_ArctoidR1     | CTGCCATAAGGCAGTCCCCT       | This study  |
| Tas1r1_ex4_CaniformF1    | GGAGGGCTCTGAATTTCCAGATGG   | This study  |
| Tas1r1_ex4_CaniformR1    | CATGTTGGCCTGGTACCTGGGA     | This study  |
| Tas1r1_ex4_GuloF1        | CTCTGATCCCTGTTTATTTTTCAG   | This study  |
| Tas1r1_ex4_MustCaniF1    | GGCCTCCAGTTCAGCTGGACAT     | This study  |
| Tas1r1_ex4_MustlctF1     | GAGAAGGAACGGTCTTTTGC       | This study  |
| Tas1r1_ex4_MustlctF2     | GCCCCAGGCACTTGCTTC         | This study  |
| Tas1r1_ex4_MustlctR1     | CCAGGCTCCAGGCTGCCATAA      | This study  |
| Tas1r1_ex4_MustlctR2     | TGTCCAGAGCATCCCCAGGCTC     | This study  |
| Tas1r1_ex4_OtaridR1_last | GTCCACAGTATCCTCAGGCTCC     | This study  |
| Tas1r1_ex4_PinniF1_last  | CATCTATGGCAGCTCCCTGGTC     | This study  |
| Tas1r1_ex4_UrsidR1       | CTTGTGAGTGACCATGTCTC       | This study  |
| Tas1r1_ex5_lctR1         | CTCGCCGGTGCCCTTCARGACAGT   | This study  |
| Tas1r1_ex5_itatsiR2      | GACCCTAGGAGTGCCAGTCATC     | This study  |
| Tas1r1_ex5_itatsiR3      | CCCCTCATCTGCTCTATAGACCC    | This study  |

**Table S7. Primers used to amplify exon 5 of *TAS1R1***

| Name                         | Sequence (5' to 3')         | Source      |
|------------------------------|-----------------------------|-------------|
| T1R1_EX5_F1                  | CAGAACACCTGTGGCTTCTTGCAGGT  | Reference 1 |
| T1R1_EX5_R1                  | CACTCACCRCTCTTGTGAGGAAGSTSC | Reference 1 |
| Tas1r1_ex3_MustF1            | ATTGGCACGGTGTGGGTGTGGCCAT   | This study  |
| Tas1r1_ex5_ArctoidF1         | CCAGGCCAACATGGCTCT          | This study  |
| Tas1r1_ex5_CanidF1           | TCTGGGAGTGAGCTGTGAAGG       | This study  |
| Tas1r1_ex5_CanidF2           | GGCAGATGCACAGAGACTATTTCC    | This study  |
| Tas1r1_ex5_CanidR1           | CCTTACCCAGGTAGCTGCAGGCAAAG  | This study  |
| Tas1r1_ex5_caniformR1_last   | GACCCTAGGAGTGCCAGTC         | This study  |
| Tas1r1_ex5_caniformR2_last   | AAGACATAGTGGGTCTGAGGA       | This study  |
| Tas1r1_ex5_GpandF1           | TACTGTGGACACAGCTTACAC       | This study  |
| Tas1r1_ex5_lctR1             | CTCGCCGGTGCCCTTCARGACAGT    | This study  |
| Tas1r1_ex5_intArctoidR1      | CTGGTGCCCTTCAAGACAGTCG      | This study  |
| Tas1r1_ex5_itatsiF1          | GGACACTCCCATGCTACCTGTGC     | This study  |
| Tas1r1_ex5_itatsiR1          | CGCCCACTCTCTAGACACTCAC      | Reference 2 |
| Tas1r1_ex5_itatsiR2          | GACCCTAGGAGTGCCAGTCATC      | This study  |
| Tas1r1_ex5_itatsiR3          | CCCCTCATCTGCTCTATAGACCC     | This study  |
| Tas1r1_ex5_MustelidaeF1      | AGTCCGTGTGCTCCAGCGACTG      | This study  |
| Tas1r1_ex5_MustelidaeR1      | GTGTGACCCAAGGGGGAT          | This study  |
| Tas1r1_ex5_MustF1            | ACTGTCTGGAAGGGCACCAGCGGG    | This study  |
| Tas1r1_ex5_MustF2            | ACTGTCTTGAAGGGCACCAGCGAG    | This study  |
| Tas1r1_ex5_MustlctF1_last    | GTCATTGTGGGTTTCTACCAC       | This study  |
| Tas1r1_ex5_MustlctF2_last    | GTGCCTAAGTCCGTGTGCTCCAG     | This study  |
| Tas1r1_ex5_MustlctF4         | GCAGGTGCCTAAGTCCGTGTGC      | This study  |
| Tas1r1_ex5_MustR1            | CCCGCTGGTGCCCTTCCAGACAGT    | This study  |
| Tas1r1_ex5_MustR2            | CTCGCTGGTGCCCTTCAAGACAGT    | This study  |
| Tas1r1_ex5_OtaridF1_last     | GCAGGTGCCCGAGTCTGTGTGC      | Reference 2 |
| Tas1r1_ex5_PinniCanidR2_last | GCTTCCTCAGAATTCAGTCTGG      | Reference 2 |
| Tas1r1_ex5_TrueMartenF1      | CACCTGTGGCTTCTTGCAGGTG      | This study  |
| Tas1r1_ex5_UrsidF1           | CCAGGCAGCACCCAGATGGCGAG     | This study  |



**Table S8.** Primers used to amplify exon 6 of *TAS1R1*

| Name                         | Sequence (5' to 3')         | Source      |
|------------------------------|-----------------------------|-------------|
| T1R1_EX6_F1                  | CCTTTYCTTCCAGACCTCCACAGMTGC | Reference 1 |
| T1R1_EX6_intF1               | TACCAGCGCTTCCCTCAGCT        | Reference 2 |
| T1R1_EX6_intR1               | AAAGGCGCTGACGGACAGGA        | Reference 2 |
| T1R1_EX6_R1                  | TCAGGTGGAGCCGCAGCGCC        | Reference 1 |
| Tas1r1_ex5_itatsiF1          | GGACACTCCCATGCTACCTGTGC     | This study  |
| Tas1r1_ex6_ArctoidF1         | GTAATTCATACAGGCATCTTG       | Reference 2 |
| Tas1r1_ex6_ArctoidR1         | GTGCGTGGGAAGCAGGTTTCAC      | Reference 2 |
| Tas1r1_ex6_CanidF2           | CCTTCCTCATTCTGAAGTGTGCT     | This study  |
| Tas1r1_ex6_CanidR2           | GTGCGTAGGAAGCAGGATTCAC      | This study  |
| Tas1r1_ex6_CaniformiaF1      | GCCAGCCTTGTGGAAAGAAGA       | Reference 2 |
| Tas1r1_ex6_lctF1             | ACCTCCACAGCTGCCAGCCTTGT     | This study  |
| Tas1r1_ex6_lctF2             | AGGAGCCTTCTGGCTTTCCTCCAG    | This study  |
| Tas1r1_ex6_lctR2             | GGCCACTGAAGTGGTACCACA       | This study  |
| Tas1r1_ex6_intCanidF1        | ACCCCGTTGCCACCAGGGA         | This study  |
| Tas1r1_ex6_intCanidR1        | ATGAAGCCCGGGGAGTTGGCCT      | This study  |
| Tas1r1_ex6_intlctMelF1       | CTCAGCTGGTGGTCTCGACTGC      | This study  |
| Tas1r1_ex6_intMelF1          | GCTTCATGTTGGCTTTCGCCTAT     | This study  |
| Tas1r1_ex6_intMustelaF1      | GCTTCCTGTTGGCTTTCGCCTAC     | This study  |
| Tas1r1_ex6_intMusteloideaF1  | GCTTCATGTTGGCTTTCGCCTAC     | This study  |
| Tas1r1_ex6_intMusteloideaR1  | CCCAAGAGATAGGTTTCATGCCA     | Reference 2 |
| Tas1r1_ex6_intMustF1         | TGACTTGGCTTGGCGGTGGAC       | This study  |
| Tas1r1_ex6_intMustF2         | GGCCAGCTGCTCATCTGT          | This study  |
| Tas1r1_ex6_intMustR1         | CCTTGCCAGGTAGCTGCAGGCAAAG   | This study  |
| Tas1r1_ex6_intOtaroidR1      | GGGAGTTGGCCTCTGTGCAAT       | Reference 2 |
| Tas1r1_ex6_intUrsidF1        | GCTGGTGGTCTTGATTGCACAG      | This study  |
| Tas1r1_ex6_intUrsidF2        | CCCCACTGCCACCAGGGAATA       | This study  |
| Tas1r1_ex6_intUrsidR1        | GCCATTGTAGGCGAATGCCAAC      | This study  |
| Tas1r1_ex6_MustelidaeF1_last | CACTCCTGTTCTGCTCATCTAGC     | This study  |
| Tas1r1_ex6_MustelidaeR1_last | GTAGCTGCAGGCAAAGGCGCTGA     | This study  |
| Tas1r1_ex6_MustelidaeR2_last | GCTGGCCCTGCCCGCCTCCGCGG     | This study  |
| Tas1r1_ex6_MustelidaeR3_last | CGGAGGAGGTGTCAGGCCCGCC      | This study  |
| Tas1r1_ex6_MustGuloR1_last   | TCCCTGGGCTGGCCCTGCCCGCCT    | This study  |
| Tas1r1_ex6_MustLutF1         | CTCAGGAGCCTTCTGGCTTTC       | This study  |
| Tas1r1_ex6_MustLutF2         | CCTCACTCCTGTTCTGCTCATC      | This study  |
| Tas1r1_ex6_MustLutF3         | GCAGGCCTATGTGGCCTCCCT       | This study  |
| Tas1r1_ex6_MustR1            | CGCCTCGCTCGACCCGCGAC        | This study  |
| Tas1r1_ex6_PinniRedF1        | CTCAGGAGCCTTCTGCCTTTC       | Reference 2 |
| Tas1r1_ex6_UrsidR2           | TCGTGGCCCTGCCCGCCTCAGT      | This study  |

**Table S9.** Primers used to amplify exon 1 of *TAS1R2*

| Name               | Sequence (5' to 3')     | Source      |
|--------------------|-------------------------|-------------|
| Tas1r2_ex1_CarniF1 | AGCTGCCAGCTCTCTGATGAG   | Reference 2 |
| Tas1r2_ex1_MfuroR1 | CCAGCCTCACATGGGAGACTCAC | This study  |

**Table S10.** Primers used to amplify exon 2 of *TAS1R2*

| Name                   | Sequence (5' to 3')     | Source     |
|------------------------|-------------------------|------------|
| Tas1r2_ex2_MustF1      | GCTTCCCACCCCACCCCATGTGG | This study |
| Tas1r2_ex2_MustPinniF1 | GTTTTCTATGKGAGGCAGAGGG  | This study |
| Tas1r2_ex2_MustPinniF2 | TCCCTTYCCCTTCTCACTCTG   | This study |
| Tas1r2_ex2_MustPinniF3 | AAAATGCCAGAATCTTCTGGAG  | This study |
| Tas1r2_ex2_MustPinniR1 | GTGAGCCCTCTGGACAACCACTC | This study |
| Tas1r2_ex2_MustPinniR2 | GCTTCTGCCTCCTCCTACCCCAT | This study |

**Table S11.** Primers used to amplify exon 3 of *TAS1R2*

| Name                    | Sequence (5' to 3')     | Source     |
|-------------------------|-------------------------|------------|
| Tas1r2_ex3F_intCarniR1  | ACACGGCGCCCGTGAAGTTCTGG | This study |
| Tas1r2_ex3F_intCarniR2  | ACCGGGTCGATGGCCAGGACTC  | This study |
| Tas1r2_ex3F_MfuroF1     | GGCTGCCACGGTCAGCAGAGACC | This study |
| Tas1r2_ex3F_MfuroF2     | TGGGGCGACAGTGGCCTGGGGAG | This study |
| Tas1r2_ex3L_AcinereF2   | CCCGGGCTTCAGCGAGTTCCGC  | This study |
| Tas1r2_ex3L_MfuroR1     | ACTACCCACGGGCGGGGCCTCAC | This study |
| Tas1r2_ex3L_MustPinniF1 | GCAGCTGTGGAAATCAAGGCTAG | This study |

**Table S12.** Primers used to amplify exon 4 of *TAS1R2*

| Name                   | Sequence (5' to 3')     | Source     |
|------------------------|-------------------------|------------|
| Tas1r2_ex4_MfuroR1     | CCCGCAGCCATCGGAGAGCTGAC | This study |
| Tas1r2_ex4_MustPinniF1 | GCAGCTGTGGAAATCAAGGCTAG | This study |

**Table S13.** Primers used to amplify exon 5 of *TAS1R2*

| Name                   | Sequence (5' to 3')      | Source     |
|------------------------|--------------------------|------------|
| Tas1r2_ex5_CarniF1_2   | CTAGTTGGGCTCAGGGTCTC     | This study |
| Tas1r2_ex5_CarniR2     | GAGGGCTGTTCCCTTCTCCCAC   | This study |
| Tas1r2_ex5_CarniR3     | GGGKGYRGGTCTGCAAGTCCTAC  | This study |
| Tas1r2_ex5_CarniR4     | CTACATGTRYGTGGAGTGGGGA   | This study |
| Tas1r2_ex5_MfuroR1     | GGGTGCAGGTCTGCAAGTCCTAC  | This study |
| Tas1r2_ex5_MustF2      | AGGTCCAGTTCTAATGGCAG     | This study |
| Tas1r2_ex5_MustPinniF1 | TCAGGCAGGCCAAACTAAGAGGG  | This study |
| Tas1r2_ex5_MustPinniF2 | CATCCCAGACAGGGGCCAGGC    | This study |
| Tas1r2_ex5_MustR2      | CTCCCTAACAGTGTGCACTGAGGG | This study |

**Table S14.** Primers used to amplify exon 6 of *TAS1R2*

| Name                   | Sequence (5' to 3')     | Source     |
|------------------------|-------------------------|------------|
| Tas1r2_ex6F_intMfuroR1 | CCGTGAAGGACGCCACGAAGAC  | This study |
| Tas1r2_ex6F_intMfuroR2 | GCCTTGCGGTAGTTGCAGGACAG | This study |
| Tas1r2_ex6F_MfuroF1    | AGCAAGGTGGGTGTGGCTGA    | This study |
| Tas1r2_ex6F_MfuroF2    | GAAGCTTCCCTGGGCTTTTGCAG | This study |
| Tas1r2_ex6L_intCarniF2 | GCTTCACCATCTGCATCTCCTGC | This study |
| Tas1r2_ex6L_intCarniF3 | TGGTCACCATCCTGGACCTCTTG | This study |
| Tas1r2_ex6L_MfuroR1    | AAGCCTCCGGCCTCCTGGGCAGC | This study |
| Tas1r2_ex6L_MfuroR2    | GGTGTCCCTGTGCCAGCTGGGG  | This study |
| Tas1r2_ex6M_intCarniF2 | GCTTCACCATCTGCATCTCCTGC | This study |
| Tas1r2_ex6M_intCarniR3 | CTGATGCCCAGAAGGTTGAG    | This study |

**Table S15.** Primers used to amplify exon 1 of *TAS1R3*

| Name                          | Sequence (5' to 3')      | Source      |
|-------------------------------|--------------------------|-------------|
| Tas1r3_ex1_ArctoidF1          | AGGGGCCCTGGGCTTGGCAG     | Reference 2 |
| Tas1r3_ex1_ArctoidF2          | GATTTTGCTAAGCAAATCCTCTGC | Reference 2 |
| Tas1r3_ex1_ArctoidF3          | TCCCTGCTGGAAGCTGCCACCTGC | This study  |
| Tas1r3_ex1_CanifF1            | TCTCATTTGCCRTCCCTGCTGGAA | This study  |
| Tas1r3_ex1_CarniR1onEx2       | GGCCAGCGCCAGAGCAGGCC     | Reference 2 |
| Tas1r3_ex1_MustelidaeF1       | AAGCAAATCCTCTGCTCTCCCC   | This study  |
| Tas1r3_ex1_MustelidaeR1       | ACACCCTGTCCCCACTC        | This study  |
| Tas1r3_ex1_MustelidaeR2       | TGGGGCCACACAGGGCTGTGGG   | Reference 2 |
| Tas1r3_ex1_MusteloideaR1onEx2 | GATCTCCTCCACGGCCATCTTCA  | This study  |

**Table S16.** Primers used to amplify exon 2 of *TAS1R3*

| Name                           | Sequence (5' to 3')     | Source      |
|--------------------------------|-------------------------|-------------|
| Tas1r3_ex2_CaniformR1onEx3     | TCTCCCGGTTGCTCAGCCGGTC  | This study  |
| Tas1r3_ex2_CarniF1onEx1        | CCAATGCCACYGTGTGCACCAG  | Reference 2 |
| Tas1r3_ex2_CarniF2onEx1        | GTGCTGGGYGGGCTTCCCCCT   | This study  |
| Tas1r3_ex2_CarniR1onEx3        | TTGCTCAGCCGGTCGGTGCTGGC | Reference 2 |
| Tas1r3_ex2_CarniR2onEx3        | CCGTGCGGAAGAAGGAYGGGAAG | This study  |
| Tas1r3_ex2_CaUrMuF1onEx1       | CCCAATGCCACCGTGTGCACCAG | This study  |
| Tas1r3_ex2_IctF1               | TGTTCTTGAGTGGGGACAGGGT  | This study  |
| Tas1r3_ex2_LutGulF1            | TGCTCCTGAGTGGGGACAGGGT  | This study  |
| Tas1r3_ex2_MustelaF1           | GGCTCCCGAGTGGGGACAGGGT  | This study  |
| Tas1r3_ex2_MustelaF2           | TCCCGAGTGGGGACAGGGT     | This study  |
| Tas1r3_ex2_MustelaR1           | CTCCTGAGGTGGGGCCTCCTGCG | This study  |
| Tas1r3_ex2_MustelidaeF2        | TCCYGAGTGGGGACAGGGT     | This study  |
| Tas1r3_ex2_MustelidaeF2onEx1-2 | GGTCTGGGCGGCAGGACACAAC  | This study  |
| Tas1r3_ex2_MustelidaeR2        | GTAGCTGACCTGCARGGACAGCG | This study  |
| Tas1r3_ex2_MustelidaeR2onEx3   | CTGCAGGGACAGCGAGGCAGCT  | This study  |

**Table S17.** Primers used to amplify exon 3 of *TAS1R3*

| Name                           | Sequence (5' to 3')      | Source      |
|--------------------------------|--------------------------|-------------|
| Tas1r3_ex3_CanidR1             | CTGACACTGCTCCTCAGAAGTGC  | This study  |
| Tas1r3_ex3_CanifF1onEx2        | GTTCTTCAGCTTCTCCTCATGCC  | Reference 2 |
| Tas1r3_ex3_CanifF2onEx2        | GCAAYTACACGCAGTACCAGCCCC | This study  |
| Tas1r3_ex3_CaniformF1onEx2     | GCAAGTTCTTCAGCTTCTTCT    | This study  |
| Tas1r3_ex3_GulF1               | CAGGAGCCCCCACCTCAGGAGC   | This study  |
| Tas1r3_ex3_intArctoidR1        | CACCCACACCTTGGGCGAGAGCC  | Reference 2 |
| Tas1r3_ex3_intArctoidR2        | GAGGTCAGCCAGGCCTCRCTGG   | Reference 2 |
| Tas1r3_ex3_intCarniF1          | CTGCACCAGGTRAACCAGAGCAG  | Reference 2 |
| Tas1r3_ex3_intCarniF2          | AGCAGYGTGCRGGTGGTGGTGCT  | This study  |
| Tas1r3_ex3_intCarniR1          | TGCTGTAGCTGAAGAGGGTGCGG  | Reference 2 |
| Tas1r3_ex3_intCarniR2          | CTGGCCACCCACACCTTGGG     | This study  |
| Tas1r3_ex3_intCaUrPiR1         | AGCCAGGCCTCACTGGCCACCCA  | This study  |
| Tas1r3_ex3_intGulMelR1         | AGAGCCTGCAGCGGATGCTGTAG  | This study  |
| Tas1r3_ex3_intLutGuloF1        | AGGTGAACCAGAGCCGCGTGCAGG | This study  |
| Tas1r3_ex3_intMusLutF2         | GCTGGTGCTCTTCTCCTCCGCC   | This study  |
| Tas1r3_ex3_intMusteloideaF1    | GGACCTGCTGCGCCAGGTGAACC  | This study  |
| Tas1r3_ex3_intMusteloideaF2    | CTGCGCCAGGTGAACCAGAGCCG  | This study  |
| Tas1r3_ex3_intMusteloidR1      | AGCCAGGCCTCGCTGGCCACCCA  | This study  |
| Tas1r3_ex3_intProcyonF1        | CCTGCTGCACCAGGTCAACCAGA  | This study  |
| Tas1r3_ex3_intUrsidF1          | TGCACCAGGTGAACCAGAGCAG   | This study  |
| Tas1r3_ex3_MusLutF1            | TTCTTCCTCATGCCTCAGGTGTGC | This study  |
| Tas1r3_ex3_MusLutF2            | CCCGCAGGAGGCCCCACC       | This study  |
| Tas1r3_ex3_MustelaR1           | CGGAACTCCTCCTCCAGAGCAT   | This study  |
| Tas1r3_ex3_MustelidaeF1        | AGCTGCCTCGCTGTCCCTGCAG   | This study  |
| Tas1r3_ex3_MustelidaeR1        | KGGGGGCTCCCTGCCCTTAC     | This study  |
| Tas1r3_ex3_MustelidaeR1onEx3-4 | CCTTACCTGCCAGGGCYGCACAG  | This study  |
| Tas1r3_ex3_MustelidaeR1onEx4   | GCGTGGAAAGGCATGTTGTACAT  | This study  |
| Tas1r3_ex3_MusteloidR1onEx4    | TGTTGTACATGTTCTCGAGGAG   | This study  |
| Tas1r3_ex3_UrsidR1             | CTGAAATTCCTTCTCAGGAGTGC  | This study  |
| Tas1r3_ex3_UrsidR1onEx4        | GTCATAATCCATGTGCACGTTCCC | This study  |

**Table S18.** Primers used to amplify exon 4 of *TAS1R3*

| Name                         | Sequence (5' to 3')     | Source      |
|------------------------------|-------------------------|-------------|
| Tas1r3_ex4_AiMepF1onEx3      | CACAACACGCTGCTCTGCAC    | This study  |
| Tas1r3_ex4_AiMepR1onEx5      | CAGTCCACGCAGTCATAACAGCA | This study  |
| Tas1r3_ex4_CanidF1onEx3      | AACACACTGCTCTGCAATGCCTC | This study  |
| Tas1r3_ex4_CanidR1onEx5      | TAGCAGCAGGAGTGGGAAGCC   | This study  |
| Tas1r3_ex4_CarniR1onEx5      | CCRGGAGCACTGGGACACGGGC  | This study  |
| Tas1r3_ex4_CaUrMuF1onEx3     | GTGTAYGGCGTGGCCAGGCCCT  | This study  |
| Tas1r3_ex4_MeloF1onEx3       | GGCCCTCCACAACACACTGCTCT | This study  |
| Tas1r3_ex4_MusLutF1onEx3     | CTGCTCTGCACTGCCTCAGGCTG | This study  |
| Tas1r3_ex4_MusLutMeloR1onEx5 | CCTTTCACTCGGCGCACCTGGCC | This study  |
| Tas1r3_ex4_MustelaR1onEx5    | CCGGGAGCACTGCGACACAGGC  | This study  |
| Tas1r3_ex4_MustelidaeR2onEx5 | CAGCAGGARTGGAAGCCTTTC   | Reference 2 |

**Table S19.** Primers used to amplify exon 5 of *TAS1R3*

| Name                           | Sequence (5' to 3')     | Source      |
|--------------------------------|-------------------------|-------------|
| Tas1r3_ex5_CanidF1             | CAGCACAGCACAGCCTGAGCCCC | This study  |
| Tas1r3_ex5_CanifF1onEx4        | GCAGTCCCAGCTGTCCTGGCACA | Reference 2 |
| Tas1r3_ex5_CarniR1onEx6        | CACRCTGGGTGCAGAGGAGGTCA | Reference 2 |
| Tas1r3_ex5_CarniR2onEx6        | GGTCYGGGGACCACTGGTYCTG  | Reference 2 |
| Tas1r3_ex5_GulR1               | GCTCATGCAGGCCTAGGAGAGC  | This study  |
| Tas1r3_ex5_GuMelR1             | CAGAGTTGGCCTTGGAGCCAGGA | This study  |
| Tas1r3_ex5_MustelaF1           | CAGCCAAGCACAACTGAGCCCC  | This study  |
| Tas1r3_ex5_MustelidaeF1        | GGCCGCCTGAAGCTCTGGC     | This study  |
| Tas1r3_ex5_MustelidaeF1onEx4-5 | CCCAGGAACAAGCTCTAGCTC   | This study  |
| Tas1r3_ex5_MustelidaeR1        | CCACTKGCTCTGGCCTCAGAGT  | This study  |
| Tas1r3_ex5_UrMuR1onEx6         | ACACTGGGTGCAGAGGAGGTCAT | This study  |
| Tas1r3_ex5_UrsidF1onEx4        | GTCCTGGCACACGCCAGGGAACC | This study  |

**Table S20.** Primers used to amplify exon 6 of *TAS1R3*

| Name                        | Sequence (5' to 3')      | Source      |
|-----------------------------|--------------------------|-------------|
| Tas1r3_ex6F_AiMepF1onEx5    | TGCTGTTATGACTGCGTGGACTG  | This study  |
| Tas1r3_ex6F_ArctoidF1       | GCTACCAGCGCAGCCCAGGT     | This study  |
| Tas1r3_ex6F_ArctoidF2       | ACTCTGAGGCCAGAGCAAGTG    | This study  |
| Tas1r3_ex6F_CanifF1onEx5    | TGCGTGGACTGCAAGGCCGGCA   | This study  |
| Tas1r3_ex6F_CanifF2onEx5    | GGCTTCRCTCCTGCTGTTA      | Reference 2 |
| Tas1r3_ex6F_CaUrF1onEx5     | GGCAGCTATCAGCGCAGCCAG    | This study  |
| Tas1r3_ex6F_intCaUrdR1      | AAGGTGRAGCAGTGGCTGCTGGG  | This study  |
| Tas1r3_ex6F_intCaUrMuR1     | AGTGGCTGCTGGGCCAGGCAGCT  | This study  |
| Tas1r3_ex6F_intMustelidaeR1 | GGCTGCTGGGCCAGGCAGCTGGC  | This study  |
| Tas1r3_ex6F_intMustelidaeR2 | AAGTGTGCTCAGGCAGCCAGT    | This study  |
| Tas1r3_ex6F_intMusteloidR1  | GTGTGCTCAGGCAGCCAGT      | This study  |
| Tas1r3_ex6F_intMustR1       | AATGTGGAGCAGTGGCTGCTGGG  | This study  |
| Tas1r3_ex6F_MustelidaeF1    | ACTCTGAGGCCAGAGCAAGTGGG  | This study  |
| Tas1r3_ex6F_MustelidaeF2    | CCCAGGCCTGCMTGAGCTGAGGA  | This study  |
| Tas1r3_ex6L_ArctoidR1       | TCAGCAGCTGGGGTACAGTCTGG  | Reference 2 |
| Tas1r3_ex6L_ArctoidR2       | AGTCARCYTGCAGTCAGGATC    | This study  |
| Tas1r3_ex6L_CanidR1         | TCAGCAGCTGGGGTCCAGGTTGG  | This study  |
| Tas1r3_ex6L_CanidR2         | GTTAGCCTACAGTTAGGATC     | This study  |
| Tas1r3_ex6L_intArctoidF1    | GGTGACGGACTGGTGGGTGCTGC  | Reference 2 |
| Tas1r3_ex6L_intCanidF1      | GGTGACAGACTGGTGGGTGCTAC  | This study  |
| Tas1r3_ex6L_intMustelidaeF1 | GTGCGCTCCTGGGTCAGCTTC    | This study  |
| Tas1r3_ex6L_intUrsidF1      | GACTGGTGGGTGCTGCCACA     | This study  |
| Tas1r3_ex6L_MuslcLuR1       | CATCGCAGCTAAGTCTGGGT     | This study  |
| Tas1r3_ex6L_MustelidaeR1    | TTGCTTCATAGGAACCTGGTT    | This study  |
| Tas1r3_ex6L_UrsidR1         | GGTACAGTCTGGGGGTTGCTTC   | This study  |
| Tas1r3_ex6M_intCanidF1      | GGTGGCCCTGGGGCTCTTTAT    | This study  |
| Tas1r3_ex6M_intCarniF1      | CTGCCTGGGCCTKGTCTGCCTCAG | This study  |
| Tas1r3_ex6M_intCarniR1      | GTGCCAGGAAGCAGAGGARGGC   | Reference 2 |
| Tas1r3_ex6M_intCarniR2      | GATCCAGGTGAYRAAGTAGG     | Reference 2 |
| Tas1r3_ex6M_intCaUrMuR1     | CAGGAAGCAGAGGAAGGCCAGCA  | This study  |
| Tas1r3_ex6M_intCaUrPiF1     | GGGCCACGGCCCTGCTTTGGC    | This study  |
| Tas1r3_ex6M_intMustelidaeF1 | CCACTGGTTCAGGCCTCAGGTGG  | This study  |
| Tas1r3_ex6M_intMustelidaeF2 | CCATGGGCCTGCTTTGGCCTGG   | This study  |
| Tas1r3_ex6M_intMustelidaeF3 | CAGCGTCCTCCTGTTCCCTGGCC  | This study  |
| Tas1r3_ex6M_intMustelidaeR1 | GGAAGGCCAGCACAGCATTGG    | This study  |
| Tas1r3_ex6M_intMustelidaeR2 | CTGCCAGGAAGGTGCCCAGG     | This study  |
| Tas1r3_ex6M_intMusteloidR1  | GCACCAGGAAGGTGCCCAGGA    | This study  |
| Tas1r3_ex6M_intUrPiMuF1     | GGCAGCCCTGGGGCTCTTCAT    | Reference 2 |

— *Species name* Receptor absent  
— *Species name* Receptor present  
— *Species name* Receptor condition uncertain  
— **Feeding habit** Diets low in sweet/umami taste-eliciting compounds  
— **Feeding habit** Diets high in sweet/umami taste-eliciting compounds

P Pseudogene (with at least one inactivating mutation)  
 G Gene (no inactivating mutations; the coding region sequenced completely)  
 ? Uncertain (no inactivating mutations; the coding region sequenced incompletely)  
 - No DNA data  
 ! Receptor presence supported by behavioral sweet/umami preference tests

■ This study  
 1 Arabic numerals refer to references  
 ■ Oral food processing  
 ● Swallowing food whole

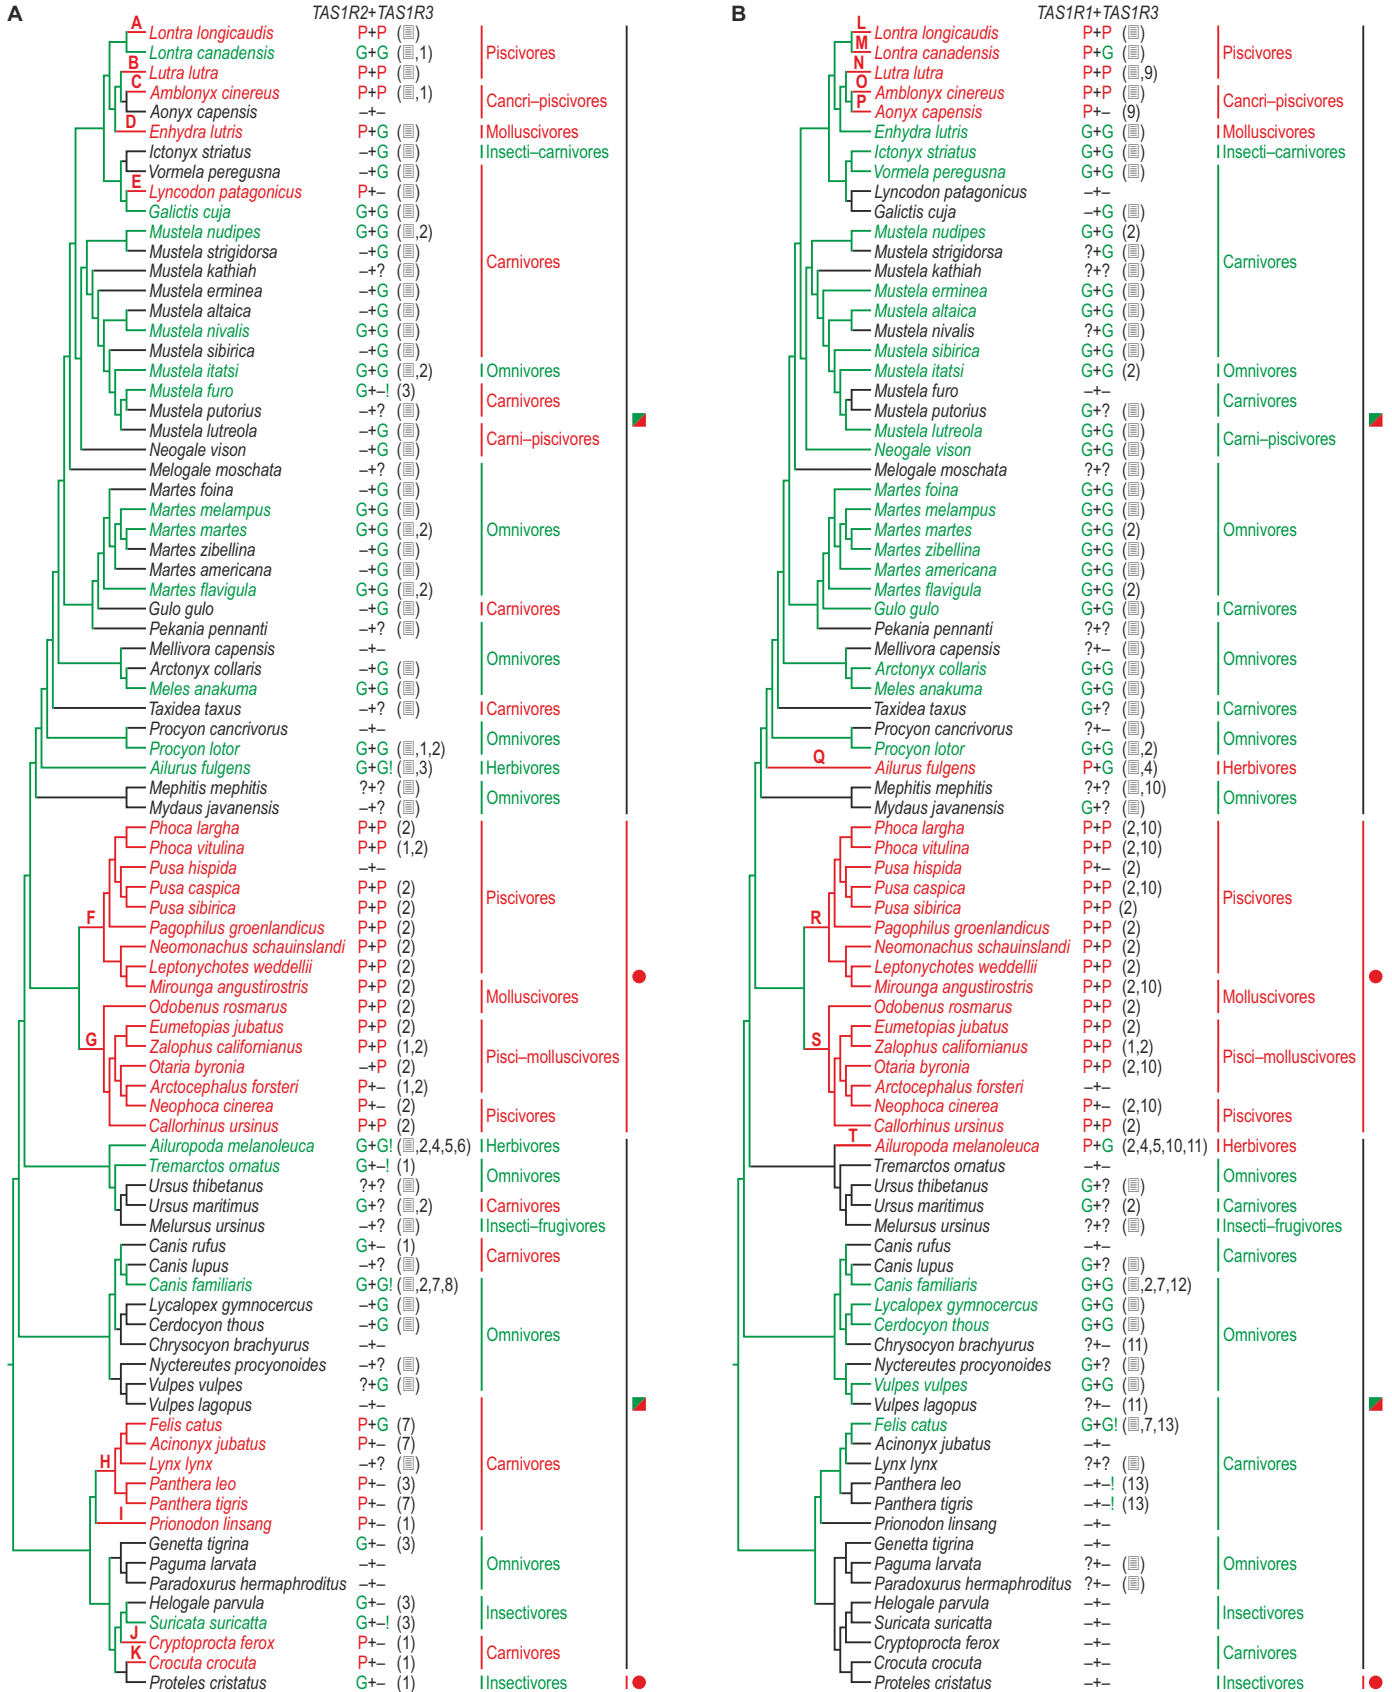

**Figure S1.** Evolution of the sweet (A) and umami (B) taste receptors in Carnivora in relation to feeding habits and modes. The events of loss of these receptors (A to T) are inferred from phylogenetic placement of *TAS1R* inactivating mutations (Tables 1 and 2). Phylogenies are compiled from references 2 and 14–21.



## References

1. Jiang P, Josue J, Li X, Glaser D, Li W, Brand JG, Margolskee RF, Reed DR, Beauchamp GK. 2012. Major taste loss in carnivorous mammals. *Proc Natl Acad Sci USA*. 109:4956–4961.
2. Wolsan M, Sato JJ. 2020. Parallel loss of sweet and umami taste receptor function from phocids and otarioids suggests multiple colonizations of the marine realm by pinnipeds. *J Biogeogr*. 47:235–249.
3. Li X, Glaser D, Li W, Johnson WE, O'Brien SJ, Beauchamp GK, Brand JG. 2009. Analyses of sweet receptor gene (*Tas1r2*) and preference for sweet stimuli in species of Carnivora. *J Hered*. 100:S90–S100.
4. Hu Y, Wu Q, Ma S, Ma T, Shan L, Wang X, Nie Y, Ning Z, Yan L, Xiu Y, et al. 2017. Comparative genomics reveals convergent evolution between the bamboo-eating giant and red pandas. *Proc Natl Acad Sci USA*. 114:1081–1086.
5. Li R, Fan W, Tian G, Zhu H, He L, Cai J, Huang Q, Cai Q, Li B, Bai Y, et al. 2010. The sequence and de novo assembly of the giant panda genome. *Nature*. 463:311–317.
6. Jiang P, Josue-Almqvist J, Jin X, Li X, Brand JG, Margolskee RF, Reed DR, Beauchamp GK. 2014. The bamboo-eating giant panda (*Ailuropoda melanoleuca*) has a sweet tooth: behavioral and molecular responses to compounds that taste sweet to humans. *PLoS One*. 9:e93043.
7. Li X, Li W, Wang H, Cao J, Maehashi K, Huang L, Bachmanov AA, Reed DR, Legrand-Defretin V, Beauchamp GK, et al. 2005. Pseudogenization of a sweet-receptor gene accounts for cats' indifference toward sugar. *PLoS Genet*. 1:e3.
8. Ferrell F. 1984. Preference for sugars and nonnutritive sweeteners in young beagles. *Neurosci Biobehav Rev*. 8:199–203.
9. Tarusawa Y, Matsumura S. 2020. Comparative analysis of the umami taste receptor gene *Tas1r1* in Mustelidae. *Zool Sci*. 37:122–127.
10. Sato JJ, Wolsan M. 2012. Loss or major reduction of umami taste sensation in pinnipeds. *Naturwissenschaften*. 99:655–659.
11. Zhao H, Yang J-R, Xu H, Zhang J. 2010. Pseudogenization of the umami taste receptor gene *Tas1r1* in the giant panda coincided with its dietary switch to bamboo. *Mol Biol Evol*. 27:2669–2673.
12. Shi P, Zhang J. 2006. Contrasting modes of evolution between vertebrate sweet/umami receptor genes and bitter receptor genes. *Mol Biol Evol*. 23:292–300.
13. Beauchamp GK, Maller O, Rogers JG Jr. 1977. Flavor preferences in cats (*Felis catus* and *Panthera* sp.). *J Comp Physiol Psychol*. 91:1118–1127.
14. Sato JJ, Wolsan M, Prevosti FJ, D'Elía G, Begg C, Begg K, Hosoda T, Campbell KL, Suzuki H. 2012. Evolutionary and biogeographic history of weasel-like carnivorans (Musteloidea). *Mol Phylogenet Evol*. 63:745–757.
15. Koepfli K-P, Deere KA, Slater GJ, Begg C, Begg K, Grassman L, Lucherini M, Veron G, Wayne RK. 2008. Multigene phylogeny of the Mustelidae: resolving relationships, tempo and biogeographic history of a mammalian adaptive radiation. *BMC Biol*. 6:10.
16. Pagès M, Calvignac S, Klein C, Paris M, Hughes S, Hänni C. 2008. Combined analysis of fourteen nuclear genes refines the Ursidae phylogeny. *Mol Phylogenet Evol*. 47:73–83.
17. Lindblad-Toh K, Wade CM, Mikkelsen TS, Karlsson EK, Jaffe DB, Kamal M, Clamp M, Chang JL, Kulbokas EJ III, Zody MC, et al. 2005. Genome sequence, comparative analysis and haplotype structure of the domestic dog. *Nature*. 438:803–819.
18. National Academies of Sciences, Engineering, and Medicine. 2019. *Evaluating the Taxonomic Status of the Mexican Gray Wolf and the Red Wolf*. Washington (DC): National Academies Press.
19. Johnson WE, Eizirik E, Pecon-Slattery J, Murphy WJ, Antunes A, Teeling E, O'Brien SJ. 2006. The late Miocene radiation of modern Felidae: a genetic assessment. *Science*. 311:73–77.

20. Gaubert P, Cordeiro-Estrela P. 2006. Phylogenetic systematics and tempo of evolution of the Viverrinae (Mammalia, Carnivora, Viverridae) within feliformians: implications for faunal exchanges between Asia and Africa. *Mol Phylogenet Evol.* 41:266–278.
21. Eizirik E, Murphy WJ, Koepfli K-P, Johnson WE, Dragoo JW, Wayne RK, O’Brien SJ. 2010. Pattern and timing of diversification of the mammalian order Carnivora inferred from multiple nuclear gene sequences. *Mol Phylogenet Evol.* 56:49–63.
